# Supplementary material
Source: PubMed Central journal article supplement (PMC424403)
Supplement: 7600219s1.pdf [file 7600219s1.pdf]

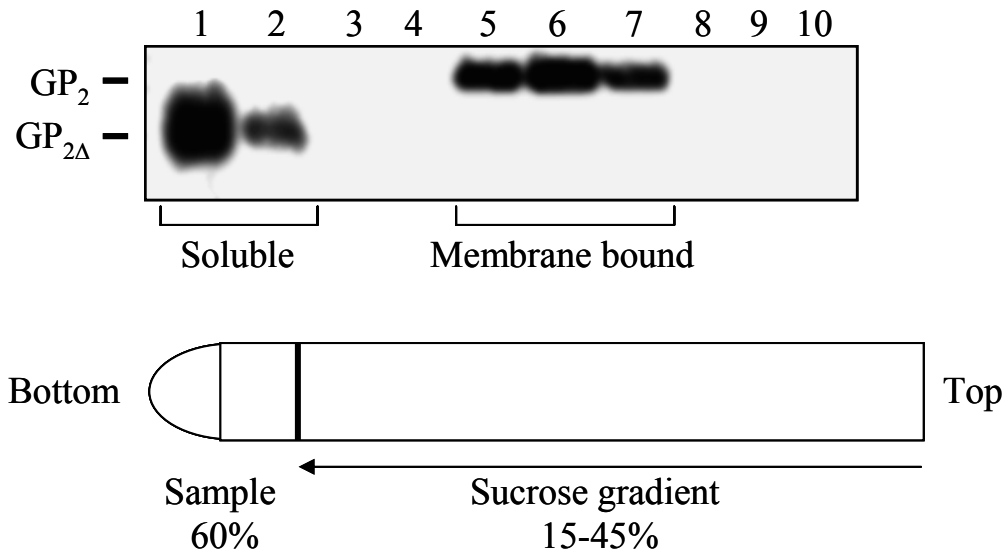

**Sup-Fig.1** Sucrose gradient flotation analysis of shed GP. 293T cells were transfected with pcDNA3.1-GP. At 36 h p.t. culture supernatants were collected and clarified by low speed centrifugation. An aliquot of the medium was mixed with sucrose (final concentration of 60%). Subsequently, the sample was laid under a linear sucrose gradient (15-45%, w/w) and subjected to centrifugation at 222 230 x g and 5°C for 20 h in a SW41 rotor (Beckman). A total of twelve 1-ml fractions were collected and detection of GP<sub>2</sub> was performed by separation of proteins on 15% SDS-PAGE under reducing conditions and immunoblotting using antiGP<sub>2</sub> antibodies. Fractions 1 to 2 represent soluble GP containing truncated GP<sub>2Δ</sub>. Fraction 5 to 7 represents membrane-bound GP containing non-truncated GP<sub>2</sub>.
