# Supplementary material
Source: PubMed Central journal article supplement (PMC424403)
Supplement: 7600219s2.pdf [file 7600219s2.pdf]

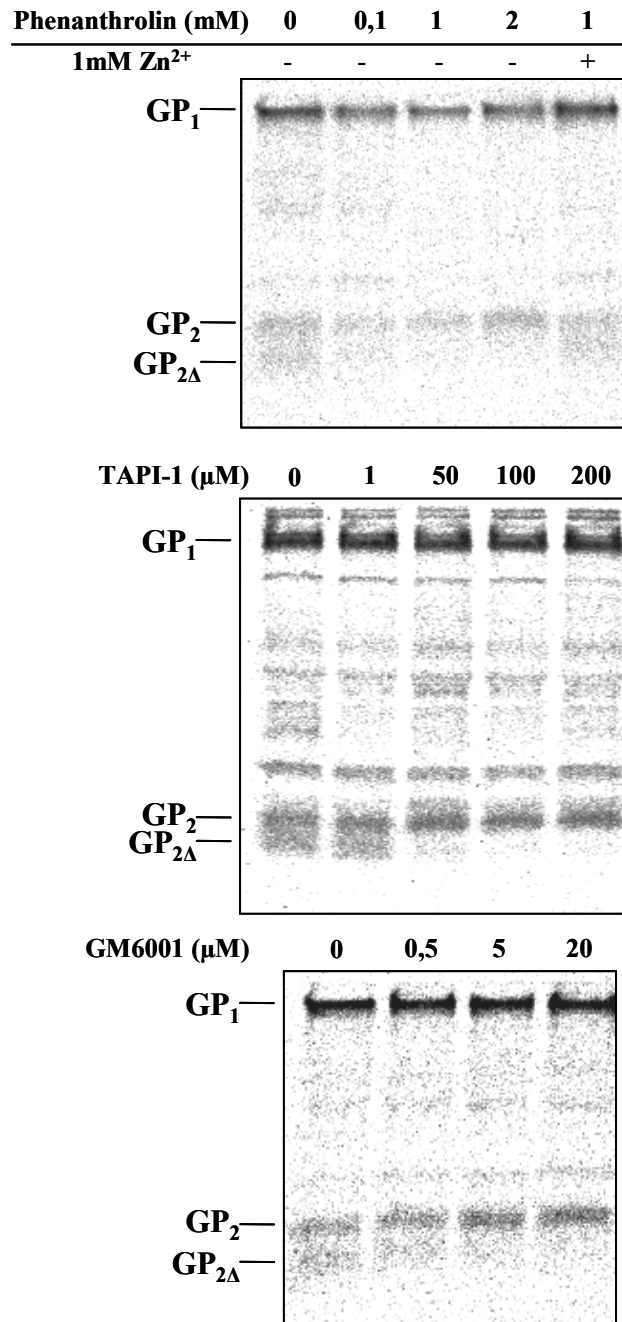

**Sup-Fig.2** Concentration dependent inhibition of GP shedding by several known inhibitors of cellular ADAMs. RK-13 cells infected with vSCGP8 were pulse- chase labeled and incubated for 8 h with protease inhibitors at indicated concentrations or let untreated. Culture medium was subjected to immunoprecipitation analysis using horse anti-EBOV antibodies. TAPI-1 and GM6001 (Galardin) have been also shown to block TNF- $\alpha$  release mediated by TACE.
