# Supplementary material
Source: PubMed Central journal article supplement (PMC424403)
Supplement: 7600219s3.pdf [file 7600219s3.pdf]

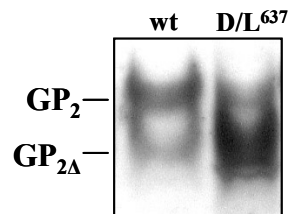

**Sup-Fig.3** Mutant of EBOV GP containing a single amino acid substitution D/L<sup>637</sup> showed a significant increase in GP shedding. 293T cells were transfected with phCMVGPwt or phCMVGPD/L<sup>637</sup> expressing wild type or mutant GP. At 36 h post transfection culture medium was collected, subjected to low speed centrifugation and analyzed for the presence of GP<sub>2</sub> by Western blot using anti-GP<sub>2</sub> specific antibodies.
